# Supplementary material
Source: HighWire-hosted journal article supplement (https://adc.bmj.com/content/archdischild-2019-318026)
Supplement: inline-supplementary-material-1 [file inline-supplementary-material-1.pdf]

## Annex 1-Quality criteria for application per study design- Integrated quality criteria for review of multiple study designs (ICROMS)

| Dimension                                             | Quality criteria                                                                                             | Study design <sup>b</sup>      |     |     |      |       |      |    |      |    |
|-------------------------------------------------------|--------------------------------------------------------------------------------------------------------------|--------------------------------|-----|-----|------|-------|------|----|------|----|
|                                                       |                                                                                                              | Specific criteria <sup>a</sup> | RCT | CBA | CITS | NCITS | NCBA | CS | QUAL |    |
| 1. Clear aims and justification                       | a. Clear statement of the aims of research?                                                                  |                                | ++  | ++  | ++   | ++    | ++   | ++ | ++   | ++ |
|                                                       | b. Rationale for number of pre-and post-intervention points or adequate baseline measurement                 |                                | x   | x   | +    | ++    | ++   |    | x    | x  |
|                                                       | c. Explanation for lack of control group                                                                     |                                | x   | x   | x    | +     | +    |    | x    | x  |
|                                                       | d. Appropriateness of qualitative methodology                                                                |                                | x   | x   | x    | x     | x    |    | x    | +  |
|                                                       | e. Appropriate study design                                                                                  |                                | x   | x   | x    | x     | x    |    | x    | ++ |
| 2. Managing bias in sampling or between groups        | a. Sequence generation                                                                                       |                                | ++  | x   | x    | x     | x    | x  | x    | x  |
|                                                       | b. Allocation concealment                                                                                    |                                | ++  | x   | x    | x     | x    | x  | x    | x  |
|                                                       | c. Justification for sample choice                                                                           |                                | x   | x   | x    | ++    | ++   |    | x    | x  |
|                                                       | d. Intervention and control group selection designed to protect against systematic difference/selection bias |                                | x   | ++  | x    | x     | x    |    | x    | x  |
|                                                       | e. Comparability of groups                                                                                   |                                | x   | x   | x    | x     | x    |    | ++   | x  |
|                                                       | f. Sampling and recruitment                                                                                  |                                | x   | x   | x    | x     | x    |    | x    | ++ |
|                                                       | g. Comparability of outcomes                                                                                 |                                | x   | x   | x    | x     | x    |    | ++   | x  |
| 3. Managing bias in outcome measurements and blinding | a. Blinding                                                                                                  |                                | ++  | x   | x    | x     | x    | x  | x    | x  |
|                                                       | b. Baseline measurement- protection against selection bias                                                   |                                | x   | ++  | x    | x     | x    | x  | x    | x  |
|                                                       | c. Protection against contamination                                                                          |                                | x   | ++  | x    | x     | x    |    | x    | x  |
|                                                       | d. Protection against secular changes                                                                        |                                | x   | x   | ++   | x     | x    |    | x    | x  |
|                                                       | e. Protection against detection bias: blinded assessment of primary outcome measures                         |                                | +   | +   | +    | +     | +    |    | +    | x  |
|                                                       | f. Reliable primary outcome measures                                                                         |                                | +   | +   | +    | +     | +    |    | +    | +  |
|                                                       | g. Comparability of outcomes                                                                                 |                                | x   | x   | x    | x     | x    |    | ++   | x  |
| 4. Managing bias in follow-up                         | a. Follow-up of subjects (protection against exclusion bias)                                                 |                                | +   | x   | x    | x     | x    |    | x    | x  |
|                                                       | b. Follow-up of patients of episodes of care                                                                 |                                | +   | x   | x    | x     | x    |    | x    | x  |
|                                                       | c. Incomplete outcome data addressed                                                                         |                                | +   | +   | +    | +     | +    |    | ++   | +  |
| 5. Managing bias in other study aspects               | a. Protection against detection bias: intervention unlikely to affect data collection                        |                                | +   | +   | +    | +     | +    |    | x    | x  |
|                                                       | b. Protection against information bias                                                                       |                                | x   | x   | x    | x     | x    |    | +    | x  |
|                                                       | c. Data collection appropriate to address research aims                                                      |                                | x   | x   | x    | x     | x    |    | x    | +  |
|                                                       | d. Attempts to mitigate effects of no control                                                                |                                | x   | x   | x    | ++    | ++   |    | x    | x  |
| 6. Analytical rigour                                  | a. Sufficient data points to enable reliable statistical inference                                           |                                | x   | x   | ++   | x     | x    |    | x    | x  |
|                                                       | b. Shaping of intervention effect specified                                                                  |                                | x   | x   | +    | x     | x    |    | x    | x  |
|                                                       | c. Analysis sufficiently rigorous/free from bias                                                             |                                | +   | +   | +    | +     | +    |    | +    | +  |
| 7. Managing bias in reporting/ethical considerations  | a. Free of selective outcome reporting                                                                       |                                | +   | +   | +    | +     | +    |    | +    | +  |
|                                                       | b. Limitations addressed                                                                                     |                                | +   | +   | +    | +     | +    |    | +    | +  |
|                                                       | c. Conclusions clear and justified                                                                           |                                | +   | +   | +    | +     | +    |    | +    | +  |
|                                                       | d. Free of other bias                                                                                        |                                | +   | +   | +    | +     | +    |    | +    | +  |
|                                                       | e. Ethics issues addressed                                                                                   |                                | +   | +   | +    | +     | +    |    | +    | +  |

<sup>a</sup> Applicability of quality criteria to each study design: + Criteria to be included in quality assessment for study design; ++ Mandatory criteria to be met quality assessment; x Criteria not to be applied in quality assessment for study design.

<sup>b</sup> Study designs: RCT =randomised controlled trial; CBA =controlled before-after; CITS ¼ controlled interrupted time series; CS = cohort study; NCITS =non-controlled interrupted time series; NCBA =non-controlled before-after; QUAL = qualitative.

Annex 2 -Decision matrix including mandatory criteria and minimum score for study type to be analysed in review.

| Study Design <sup>a</sup> | Mandatory criteria <sup>b</sup> | Minimum score |
|---------------------------|---------------------------------|---------------|
| RCT, cRCT                 | 1A, 2A, 2B, and 3A              | 22            |
| CBA                       | 1A, 2D, 3B and 3C               | 18            |
| CITS                      | 1A, 3D and 6A                   | 18            |
| NCITS                     | 1A, 1B, 2C and 5D               | 22            |
| NCBA                      | 1A, 1B, 2C and 5D               | 22            |
| Cohort                    | 1A, 2E, 3G and 4C               | 18            |
| Qualitative               | 1A, 1E and 2F                   | 16            |

<sup>a</sup> Study Designs: RCT = randomised controlled trial; CBA =controlled before-after; CITS = controlled interrupted time series; cRCT =cluster-randomized controlled trial; NCITS = noncontrolled interrupted time series; NCBA =non-controlled before-after.

<sup>b</sup> Scores applicable to each criteria: Yes (criterion met) =2 points; Unclear (unclear whether or not the criterion is met) =1 point; No (criterion not met) = 0 points.

Adapted from Zingg W et al. Innovative tools for quality assessment: integrated quality criteria for review of multiple study designs (ICROMS). Public Health 2016;133:19-37.

Annex 3- Score attributed to selected articles. Effectiveness of antimicrobial stewardship programmes in neonatology. A systematic review

| Reference      | Study design | Minimum score required | Article Score |
|----------------|--------------|------------------------|---------------|
| Chiu, 2011     | NCITS        | 22                     | 32            |
| Ting, 2019     | NCBA         | 22                     | 31            |
| Nzegwu, 2017   | NCITS        | 22                     | 30            |
| Lee, 2016      | NCITS        | 22                     | 30            |
| McCarthy, 2018 | NCBA         | 22                     | 22            |
| Cantey 2016    | NCITS        | 22                     | 28            |

NCITS: noncontrolled interrupted time series; NCBA : non-controlled before-after.
